# Supplementary material for: Heliox ventilation in older hypertensive ICU patients improves hemodynamics: A randomized controlled study
Source: Research Square preprint supplement (doi:10.21203/rs.3.rs-3999637/v1), 2024-03-05
Supplement: Supplementary file 1 [file 84b72ef52c9114c801b81a3d.docx]

**Table 1**

**Baseline characteristics. Data are shown as mean ± SD or median (interquartile)**

|  | Control group  (n=40) | Experimental group  (n=39) |
| --- | --- | --- |
| Sex M/F (n) | 29/11 | 28/11 |
| Age (years) | 76.18 ± 8.15 | 74.46 ± 8.14 |
| SBP (mmHg, 0h) | 141.83 ± 18.46 | 137.41± 18.32 |
| DBP (mmHg, 0h) | 62.53 ± 9.78 | 61.74 ± 10.47 |
| MABP(mmHg, 0h) | 88.96 ± 10.99 | 86.97 ± 11.06 |
| Scr (umol/L) | 77.00(48.75,101.75) | 77.00(54.00,128.00) |
| UA (umol/L) | 283.03 ± 129.20 | 296.03 ± 144.77 |
| TG (mmol/L) | 1.02(0.69,1.47) | 1.05(0.67,1.41) |
| TC (mmol/L) | 2.92(2.51,4.34) | 2.92(2.49,4.06) |
| LDL-C (mmol/L) | 1.74(1.45,2.75) | 1.80(1.30,2.46) |
| FPG (mmol/L) | 7.02(5.09,10.23) | 8.05(6.26,10.21) |
| HB (g/L) | 93.85 ± 21.05 | 89.23 ± 19.82 |
| T (°C) | 37.00 ± 0.56 | 36.88 ± 0.55 |
| CVP(mmHg, 0h) | 8.83 ± 0.65 | 9.07 ± 0.55 |
| Lac(mmol/L, 0h) | 1.35(1.10,2.00) | 1.40(1.10,1.80) |
| SpO2(%, 0h) | 99.00(97.00,100.00) | 98.00(96.00,100.00) |

SBP: Systolic blood pressure; DBP: Diastolic blood pressure; MABP: [Mean arterial blood pressure](http://www.so.com/link?url=http%3A%2F%2Fdict.youdao.com%2Fsearch%3Fq%3Dmean%2520arterial%2520blood%2520pressure%26keyfrom%3Dhao360&q=%E5%B9%B3%E5%9D%87%E5%8A%A8%E8%84%89%E5%8E%8B%E8%8B%B1%E6%96%87%E7%BF%BB%E8%AF%91&ts=1504911616&t=cb0d5d80988ef499618c2723c41ddd0" \t "_blank); Scr: Serum creatinine; UA: Uric acid; TG: [Triglyceride](http://www.so.com/link?url=http%3A%2F%2Fdict.youdao.com%2Fsearch%3Fq%3D%255B%25E6%259C%2589%25E5%258C%2596%255D%2520triglyceride%26keyfrom%3Dhao360&q=%E7%94%98%E6%B2%B9%E4%B8%89%E9%85%AF%E8%8B%B1%E6%96%87%E7%BF%BB%E8%AF%91&ts=1504913809&t=816da2486eed4d528cbe29c0ccaf16f" \t "_blank); TC: Total cholesterol; LDL-C: [Low density lipoprotein cholesterin](http://www.so.com/link?url=http%3A%2F%2Fdict.youdao.com%2Fsearch%3Fq%3Dlow%2520density%2520lipoprotein%2520cholesterin%26keyfrom%3Dhao360&q=%E4%BD%8E%E5%AF%86%E5%BA%A6%E8%84%82%E8%9B%8B%E7%99%BD%E8%83%86%E5%9B%BA%E9%86%87%E8%8B%B1%E6%96%87&ts=1503958903&t=b26d19cb008428f797ec82665ecf45c" \t "_blank); FPG: Fasting plasma glucose; HB: Hemoglobin; T: Body temperature; CVP: Central venous pressure; Lac: Plasma lactic acid; SpO2: Peripheral oxygen saturation; * : *P*＜0.05.

**Table 2**

**Effect of different ventilation modes on hemodynamics. Data are shown as mean ± SD or median (interquartile)**

|  |  | ventilation time | | | | | |
| --- | --- | --- | --- | --- | --- | --- | --- |
| 0h | 1h | | 2h | | 3h |
| SBP  (mmHg) | 0 | 141.83±18.46 | | 129.18±20.15 | | 128.40±18.78 | 126.25±20.26 |
| 1 | 137.41±18.32 | | 140.15±18.71 | | 141.31±17.95 | 140.59±16.95 |
| DBP  (mmHg) | 0 | 62.53±9.78 | | 57.70±9.31 | | 57.55±9.33 | 57.25±8.96 |
| 1 | 61.74±10.47 | | 63.79±10.66 | | 63.46±10.33 | 63.90±10.60 |
| MABP  (mmHg) | 0 | 88.96±10.99 | | 81.53±11.52 | | 81.17±10.79 | 80.25±11.11 |
| 1 | 86.97±11.06 | | 89.25±11.04 | | 89.41±10.74 | 89.46±10.73 |
| CVP  (mmHg) | 0 | 8.83±0.65 | | 9.35±0.67 | | 9.29±0.67 | 9.35±0.80 |
| 1 | 9.07±0.55 | | 8.16±0.44 | | 8.08±0.50 | 8.08±0.46 |
| ScvO2  (%) | 0 | 72.50±5.43 | | 65.88±4.56 | | 66.33±5.07 | 65.85±5.32 |
| 1 | 66.41±8.74 | | 71.41±8.47 | | 72.03±7.70 | 72.51±6.79 |
| HR  (bpm) | 0 | 80.35±16.24 | | 83.48±16.86 | | 83.08±17.53 | 83.58±17.52 |
| 1 | 76.62±16.98 | | 76.54±16.64 | | 76.85±15.53 | 75.92±15.39 |
| Lac  (mmol/L) | 0 | 1.35(1.10,2.00) | | 1.40(1.20,1.98) | | 1.40(1.20,2.08) | 1.38(1.20,1.90) |
| 1 | 1.40(1.10,1.80) | | 1.30(1.00,1.72) | | 1.30(1.00,1.70) | 1.20(1.00,1.60) |
| Ppeak  (cmH2O) | 0 | 20.23±3.62 | | 22.25±3.37 | | 22.28±3.43 | 22.25±3.33 |
| 1 | 26.72±4.76 | | 23.38±4.29 | | 22.74±4.17 | 22.31±4.01 |
| Pplat  (cmH2O) | 0 | 17.35±3.50 | | 19.05±3.21 | | 19.15±3.24 | 19.15±3.23 |
| 1 | 22.28±4.02 | | 19.69±3.91 | | 19.05±3.94 | 18.67±3.81 |
| ∆P  (cmH2O) | 0 | 11.35±3.50 | | 13.05±3.21 | | 13.15±3.24 | 13.15±3.23 |
| 1 | 16.28±4.02 | | 13.69±3.91 | | 13.05±3.94 | 12.67±3.81 |
| VT  (ml) | 0 | 499.5(480,521.75) | | 499.5(480,523) | | 500(480,523) | 501.5(480.25,523) |
| 1 | 483(434,520) | | 485(445,520) | | 484(441,520) | 484(448,520) |
| MV  (L/min) | 0 | 8.80(8.43,9.40) | | 8.85(8.25,9.48) | | 8.85(8.35,9.40) | 8.85(8.40,9.40) |
| 1 | 8.90(7.60,9.40) | | 9.00(7.70,9.40) | | 8.90(7.70,9.40) | 8.90(7.70,9.40) |
| SpO2  (%) | 0 | 99(97,100) | | 99(98,100) | | 98.5(98,100) | 99(98,100) |
| 1 | 98(96,100) | | 99(98,100) | | 99(98,100) | 99(98,100) |

SBP: Systolic blood pressure; DBP: Diastolic blood pressure; MABP: [Mean arterial blood pressure](http://www.so.com/link?url=http%3A%2F%2Fdict.youdao.com%2Fsearch%3Fq%3Dmean%2520arterial%2520blood%2520pressure%26keyfrom%3Dhao360&q=%E5%B9%B3%E5%9D%87%E5%8A%A8%E8%84%89%E5%8E%8B%E8%8B%B1%E6%96%87%E7%BF%BB%E8%AF%91&ts=1504911616&t=cb0d5d80988ef499618c2723c41ddd0" \t "_blank); CVP: Central venous pressure; ScvO2: Central venous oxygen saturation; HR: Heart rate; Lac: Plasma lactic acid; Ppeak: Peak airway pressure; Pplat: Platform airway pressure; ∆P: driving pressure; VT: Tidal volume; MV: Minute ventilation volume; SpO2: Peripheral oxygen saturation; 0: Control group; 1: Experimental group.

**Table 3**

**Analysis of variance of repeated measurement of SBP**

| Variation | Sum of squares of deviation (SS) | Degrees of freedom (df) | Mean square | F | P |
| --- | --- | --- | --- | --- | --- |
| Time | 1763.020 | 2.466 | 714.910 | 17.871 | <0.001 |
| Group | 5643.745 | 1 | 5643.745 | 4.324 | 0.041 |
| Time×group | 4471.804 | 2.466 | 1813.331 | 45.329 | <0.001 |

**Table 4**

**Analysis of variance of repeated measurement of DBP**

| Variation | Sum of squares of deviation (SS) | Degrees of freedom (df) | Mean square | F | P |
| --- | --- | --- | --- | --- | --- |
| Time | 140.283 | 2.524 | 55.587 | 6.344 | 0.001 |
| Group | 1576.903 | 1 | 1576.903 | 4.222 | 0.043 |
| Time×group | 731.359 | 2.524 | 289.803 | 33.074 | <0.001 |

**Table 5**

**Analysis of variance of repeated measurement of MABP**

| Variation | Sum of squares of deviation (SS) | Degrees of freedom (df) | Mean square | F | P |
| --- | --- | --- | --- | --- | --- |
| Time | 472.140 | 2.531 | 186.516 | 14.12 | <0.001 |
| Group | 2653.807 | 1 | 2653.807 | 5.888 | 0.018 |
| Time×group | 1619.842 | 2.531 | 639.907 | 48.443 | <0.001 |

**Table 6**

**Analysis of variance of repeated measurement of CVP**

| Variation | Sum of squares of deviation (SS) | Degrees of freedom (df) | Mean square | F | P |
| --- | --- | --- | --- | --- | --- |
| Time | 3.418 | 1.330 | 2.570 | 10.928 | <0.001 |
| Group | 57.491 | 1 | 57.491 | 49.966 | <0.001 |
| Time×group | 31.659 | 1.330 | 23.799 | 101.208 | <0.001 |

**Table 7**

**Analysis of variance of repeated measurement of ScvO2**

| Variation | Sum of squares of deviation (SS) | Degrees of freedom (df) | Mean square | F | P |
| --- | --- | --- | --- | --- | --- |
| Time | 27.398 | 1.426 | 19.213 | 1.775 | 0.183 |
| Group | 688.433 | 1 | 688.433 | 4.236 | 0.043 |
| Time×group | 2167.246 | 1.426 | 1519.835 | 140.396 | <0.001 |

**Table 8**

**Analysis of variance of repeated measurement of HR**

| Variation | Sum of squares of deviation (SS) | Degrees of freedom (df) | Mean square | F | P |
| --- | --- | --- | --- | --- | --- |
| Time | 122.899 | 2.138 | 57.480 | 3.877 | 0.020 |
| Group | 2975.833 | 1 | 2975.833 | 2.777 | 0.100 |
| Time×group | 172.077 | 2.138 | 80.480 | 5.429 | 0.004 |

**Table 9**

**Analysis of variance of repeated measurement of Ppeak**

| Variation | Sum of squares of deviation (SS) | Degrees of freedom (df) | Mean square | F | P |
| --- | --- | --- | --- | --- | --- |
| Time | 63.466 | 1.426 | 44.517 | 11.817 | <0.001 |
| Group | 328.218 | 1 | 328.218 | 5.928 | 0.017 |
| Time×group | 534.099 | 1.426 | 374.635 | 99.445 | <0.001 |

**Table 10**

**Analysis of variance of repeated measurement of Pplat**

| Variation | Sum of squares of deviation (SS) | Degrees of freedom (df) | Mean square | F | P |
| --- | --- | --- | --- | --- | --- |
| Time | 36.689 | 1.624 | 22.593 | 8.241 | 0.001 |
| Group | 123.038 | 1 | 123.038 | 2.568 | 0.113 |
| Time×group | 370.258 | 1.624 | 228.009 | 83.170 | <0.001 |

**Table 11**

**Analysis of variance of repeated measurement of ∆P**

| Variation | Sum of squares of deviation (SS) | Degrees of freedom (df) | Mean square | F | P |
| --- | --- | --- | --- | --- | --- |
| Time | 36.689 | 1.624 | 22.593 | 8.241 | 0.001 |
| Group | 123.038 | 1 | 123.038 | 2.568 | 0.113 |
| Time×group | 370.258 | 1.624 | 228.009 | 83.170 | <0.001 |

**Table 12**

**Multiple linear regression analysis of blood pressure and ventilation time**

| Control group | Model1 | Model2 | Model3 |
| --- | --- | --- | --- |
| SBP |  |  |  |
| *Beta* | -0.268 | -0.291 | -0.312 |
| *P* | 0.001 | 0.001 | <0.001 |
| DBP |  |  |  |
| *Beta* | -0.192 | -0.225 | -0.228 |
| *P* | 0.016 | 0.006 | 0.006 |
| MABP |  |  |  |
| *Beta* | -0.262 | -0.285 | -0.294 |
| *P* | 0.001 | <0.001 | <0.001 |

SBP: Systolic blood pressure; DBP: Diastolic blood pressure; MABP: [Mean arterial blood pressure](http://www.so.com/link?url=http%3A%2F%2Fdict.youdao.com%2Fsearch%3Fq%3Dmean%2520arterial%2520blood%2520pressure%26keyfrom%3Dhao360&q=%E5%B9%B3%E5%9D%87%E5%8A%A8%E8%84%89%E5%8E%8B%E8%8B%B1%E6%96%87%E7%BF%BB%E8%AF%91&ts=1504911616&t=cb0d5d80988ef499618c2723c41ddd0" \t "_blank). Model 1: Adjustment for age and gender; Model 2: Adjustment for age, gender, basic heart and pulmonary disease, [triglyceride](http://www.so.com/link?url=http%3A%2F%2Fdict.youdao.com%2Fsearch%3Fq%3D%255B%25E6%259C%2589%25E5%258C%2596%255D%2520triglyceride%26keyfrom%3Dhao360&q=%E7%94%98%E6%B2%B9%E4%B8%89%E9%85%AF%E8%8B%B1%E6%96%87%E7%BF%BB%E8%AF%91&ts=1504913809&t=816da2486eed4d528cbe29c0ccaf16f" \t "_blank), total cholesterol, [low density lipoprotein cholesterin](http://www.so.com/link?url=http%3A%2F%2Fdict.youdao.com%2Fsearch%3Fq%3Dlow%2520density%2520lipoprotein%2520cholesterin%26keyfrom%3Dhao360&q=%E4%BD%8E%E5%AF%86%E5%BA%A6%E8%84%82%E8%9B%8B%E7%99%BD%E8%83%86%E5%9B%BA%E9%86%87%E8%8B%B1%E6%96%87&ts=1503958903&t=b26d19cb008428f797ec82665ecf45c" \t "_blank), fasting plasma glucose, serum creatinine and uric acid; Model 3: Adjustment for hemoglobin, body temperature, minute ventilation volume and peripheral oxygen saturation on the basis of Model 2.

**Table 13**

**Multiple linear regression analysis of CVP and ventilation time**

|  | Model1 | Model2 | Model3 |
| --- | --- | --- | --- |
| Control group |  |  |  |
| *Beta* | 0.242 | 0.254 | 0.257 |
| *P* | 0.002 | 0.002 | 0.002 |
| Experimental group |  |  |  |
| *Beta* | -0.543 | -0.554 | -0.551 |
| *P* | <0.001 | <0.001 | <0.001 |

CVP: Central venous pressure. Model 1: Adjustment for age and gender; Model 2: Adjustment for age, gender, basic heart and pulmonary disease, [triglyceride](http://www.so.com/link?url=http%3A%2F%2Fdict.youdao.com%2Fsearch%3Fq%3D%255B%25E6%259C%2589%25E5%258C%2596%255D%2520triglyceride%26keyfrom%3Dhao360&q=%E7%94%98%E6%B2%B9%E4%B8%89%E9%85%AF%E8%8B%B1%E6%96%87%E7%BF%BB%E8%AF%91&ts=1504913809&t=816da2486eed4d528cbe29c0ccaf16f" \t "_blank), total cholesterol, [low density lipoprotein cholesterin](http://www.so.com/link?url=http%3A%2F%2Fdict.youdao.com%2Fsearch%3Fq%3Dlow%2520density%2520lipoprotein%2520cholesterin%26keyfrom%3Dhao360&q=%E4%BD%8E%E5%AF%86%E5%BA%A6%E8%84%82%E8%9B%8B%E7%99%BD%E8%83%86%E5%9B%BA%E9%86%87%E8%8B%B1%E6%96%87&ts=1503958903&t=b26d19cb008428f797ec82665ecf45c" \t "_blank), fasting plasma glucose, serum creatinine and uric acid; Model 3: Adjustment for hemoglobin, body temperature, minute ventilation volume and peripheral oxygen saturation on the basis of Model 2.

**Table 14**

**Multiple linear regression analysis of ScvO2 and ventilation time**

|  | Model 1 | Model 2 | Model 3 |
| --- | --- | --- | --- |
| Control group |  |  |  |
| *Beta* | -0.378 | -0.429 | -0.434 |
| *P* | <0.001 | <0.001 | <0.001 |
| Experimental group |  |  |  |
| *Beta* | 0.265 | 0.310 | 0.294 |
| *P* | 0.001 | <0.001 | <0.001 |

ScvO2: Central venous oxygen saturation. Model 1: Adjustment for age and gender; Model 2: Adjustment for age, gender, basic heart and pulmonary disease, [triglyceride](http://www.so.com/link?url=http%3A%2F%2Fdict.youdao.com%2Fsearch%3Fq%3D%255B%25E6%259C%2589%25E5%258C%2596%255D%2520triglyceride%26keyfrom%3Dhao360&q=%E7%94%98%E6%B2%B9%E4%B8%89%E9%85%AF%E8%8B%B1%E6%96%87%E7%BF%BB%E8%AF%91&ts=1504913809&t=816da2486eed4d528cbe29c0ccaf16f" \t "_blank), total cholesterol, [low density lipoprotein cholesterin](http://www.so.com/link?url=http%3A%2F%2Fdict.youdao.com%2Fsearch%3Fq%3Dlow%2520density%2520lipoprotein%2520cholesterin%26keyfrom%3Dhao360&q=%E4%BD%8E%E5%AF%86%E5%BA%A6%E8%84%82%E8%9B%8B%E7%99%BD%E8%83%86%E5%9B%BA%E9%86%87%E8%8B%B1%E6%96%87&ts=1503958903&t=b26d19cb008428f797ec82665ecf45c" \t "_blank), fasting plasma glucose, serum creatinine and uric acid; Model 3: Adjustment for hemoglobin, body temperature, minute ventilation volume and peripheral oxygen saturation on the basis of Model 2.

**Table 15**

**Multiple linear regression analysis of Ppeak and ventilation time**

|  | Model1 | Model2 | Model3 |
| --- | --- | --- | --- |
| Control group |  |  |  |
| *Beta* | 0.198 | 0.216 | 0.219 |
| *P* | 0.013 | 0.008 | 0.008 |
| Experimental group |  |  |  |
| *Beta* | -0.348 | -0.362 | -0.368 |
| *P* | <0.001 | <0.001 | <0.001 |

Ppeak: Peak airway pressure. Model 1: Adjustment for age and gender; Model 2: Adjustment for age, gender, basic heart and pulmonary disease, [triglyceride](http://www.so.com/link?url=http%3A%2F%2Fdict.youdao.com%2Fsearch%3Fq%3D%255B%25E6%259C%2589%25E5%258C%2596%255D%2520triglyceride%26keyfrom%3Dhao360&q=%E7%94%98%E6%B2%B9%E4%B8%89%E9%85%AF%E8%8B%B1%E6%96%87%E7%BF%BB%E8%AF%91&ts=1504913809&t=816da2486eed4d528cbe29c0ccaf16f" \t "_blank), total cholesterol, [low density lipoprotein cholesterin](http://www.so.com/link?url=http%3A%2F%2Fdict.youdao.com%2Fsearch%3Fq%3Dlow%2520density%2520lipoprotein%2520cholesterin%26keyfrom%3Dhao360&q=%E4%BD%8E%E5%AF%86%E5%BA%A6%E8%84%82%E8%9B%8B%E7%99%BD%E8%83%86%E5%9B%BA%E9%86%87%E8%8B%B1%E6%96%87&ts=1503958903&t=b26d19cb008428f797ec82665ecf45c" \t "_blank), fasting plasma glucose, serum creatinine and uric acid; Model 3: Adjustment for hemoglobin, body temperature, minute ventilation volume and peripheral oxygen saturation on the basis of Model 2.

**Table 16**

**Multiple linear regression analysis of Pplat and ventilation time**

|  | Model1 | Model2 | Model3 |
| --- | --- | --- | --- |
| Control group |  |  |  |
| *Beta* | 0.192 | 0.214 | 0.214 |
| *P* | 0.016 | 0.008 | 0.009 |
| Experimental group |  |  |  |
| *Beta* | -0.320 | -0.332 | -0.338 |
| *P* | <0.001 | <0.001 | <0.001 |

Pplat: platform airway pressure. Model 1: Adjustment for age and gender; Model 2: Adjustment for age, gender, basic heart and pulmonary disease, [triglyceride](http://www.so.com/link?url=http%3A%2F%2Fdict.youdao.com%2Fsearch%3Fq%3D%255B%25E6%259C%2589%25E5%258C%2596%255D%2520triglyceride%26keyfrom%3Dhao360&q=%E7%94%98%E6%B2%B9%E4%B8%89%E9%85%AF%E8%8B%B1%E6%96%87%E7%BF%BB%E8%AF%91&ts=1504913809&t=816da2486eed4d528cbe29c0ccaf16f" \t "_blank), total cholesterol, [low density lipoprotein cholesterin](http://www.so.com/link?url=http%3A%2F%2Fdict.youdao.com%2Fsearch%3Fq%3Dlow%2520density%2520lipoprotein%2520cholesterin%26keyfrom%3Dhao360&q=%E4%BD%8E%E5%AF%86%E5%BA%A6%E8%84%82%E8%9B%8B%E7%99%BD%E8%83%86%E5%9B%BA%E9%86%87%E8%8B%B1%E6%96%87&ts=1503958903&t=b26d19cb008428f797ec82665ecf45c" \t "_blank), fasting plasma glucose, serum creatinine and uric acid; Model 3: Adjustment for hemoglobin, body temperature, minute ventilation volume and peripheral oxygen saturation on the basis of Model 2.

**Table 17**

**Multiple linear regression analysis of ∆P and ventilation time**

|  | Model1 | Model2 | Model3 |
| --- | --- | --- | --- |
| Control group |  |  |  |
| *Beta* | 0.192 | 0.214 | 0.214 |
| *P* | 0.016 | 0.008 | 0.009 |
| Experimental group |  |  |  |
| *Beta* | -0.320 | -0.332 | -0.338 |
| *P* | <0.001 | <0.001 | <0.001 |

∆P: driving pressure. Model 1: Adjustment for age and gender; Model 2: Adjustment for age, gender, basic heart and pulmonary disease, [triglyceride](http://www.so.com/link?url=http%3A%2F%2Fdict.youdao.com%2Fsearch%3Fq%3D%255B%25E6%259C%2589%25E5%258C%2596%255D%2520triglyceride%26keyfrom%3Dhao360&q=%E7%94%98%E6%B2%B9%E4%B8%89%E9%85%AF%E8%8B%B1%E6%96%87%E7%BF%BB%E8%AF%91&ts=1504913809&t=816da2486eed4d528cbe29c0ccaf16f" \t "_blank), total cholesterol, [low density lipoprotein cholesterin](http://www.so.com/link?url=http%3A%2F%2Fdict.youdao.com%2Fsearch%3Fq%3Dlow%2520density%2520lipoprotein%2520cholesterin%26keyfrom%3Dhao360&q=%E4%BD%8E%E5%AF%86%E5%BA%A6%E8%84%82%E8%9B%8B%E7%99%BD%E8%83%86%E5%9B%BA%E9%86%87%E8%8B%B1%E6%96%87&ts=1503958903&t=b26d19cb008428f797ec82665ecf45c" \t "_blank), fasting plasma glucose, serum creatinine and uric acid; Model 3: Adjustment for hemoglobin, body temperature, minute ventilation volume and peripheral oxygen saturation on the basis of Model 2.
